# Supplementary material for: Health inequalities in sexual minority adolescents other than gay, lesbian and bisexual – consequences of exclusion. Findings from a national cross-sectional study
Source: Research Square preprint supplement (doi:10.21203/rs.3.rs-6572439/v1), 2025-05-07
Supplement: Supplementary file 1 [file 3ea1f577118410a78f740fff.docx]

**Supplemental Table 1.** **The original categories for sexual and gender identities, and sexual attraction that were combined for analysis**

| **Original categories** | **N** | **Collapsed for analysis** | **Final N (%)** |
| --- | --- | --- | --- |
|  |  |  |  |
| **Sexual identity** |  |  | **Used in main analysis** |
| Completely heterosexual/ straight | 7,812 | **Heterosexual** | **7,812 (78.1)** |
|  |  |  |  |
| Mainly heterosexual/ straight | 1,084 |  |  |
| Bisexual | 649 | **Sexual minority** | **1,982 (18.8)** |
| Mainly gay or lesbian | 90 |  |  |
| Completely gay or lesbian | 159 |  |  |
|  |  |  |  |
| Other | 154 |  |  |
| Do not know | 16 | **Other sexual identities** | **204 (2)** |
| Prefer not to say | 34 |  | ***9,998*** |
|  |  |  |  |
| **Gender identity** |  |  |  |
| Male | 4,852 | **Male** | **4,852 (48.5)** |
| Female | 5,033 | **Female** | **5,033 (50.3)** |
| Other | 19 |  |  |
| Androgynous | 7 | **Androgynous/gender fluid/non-binary/other** | **55 (0.6)** |
| Gender fluid | 8 |  |  |
| Non-binary | 21 |  |  |
| Prefer not to say/refused | 56 | **Prefer not to say/refused** | **59 (0.6)** |
| Don’t know | 3 |  | ***9,999*** |
|  |  |  |  |
| **Sexual attraction** |  |  |  |
| Only to opposite sex | 7,580 |  |  |
| More often to opposite sex | 1,368 |  |  |
| About equally often to opposite and same sex | 381 | **Definite sexual attraction** | **9,658 (94.3)** |
| More often to same sex | 193 |  |  |
| Only ever to same sex | 136 |  |  |
| Never felt sexually attracted to anyone | 284 | **No sexual attraction** | **284 (2.8)** |
| Do not know | 10 |  |  |
| I do not wish to answer | 45 |  |  |
| No answer | 241 | **Do not know/no answer** | **296 (2.9)** |
|  |  |  | ***10,238*** |

**Supplemental Table 2. A detailed description of mental and general health outcomes, and health-related behaviours assessed at the age 17 sweep of the Millennium Cohort Study**

| **Outcome** | **Question(s) in cohort member computer-assisted personal interview (CAPI), self-completion interview (CASI) or online questionnaire (CAWI)** | **Binary or continuous** | **Comments** |
| --- | --- | --- | --- |
| **Mental health, wellbeing & general health** |  |  |  |
| Self-reported Kessler (6 item) | During the last 30 days about how often:  - did you feel so depressed that nothing could cheer you up?  - did you feel hopeless?  - did you feel restless or fidgety?  - did you feel that everything was an effort?  - did you feel worthless?  - did you feel nervous? | Continuous | 1. All of the time  2. Most of the time  3. Some of the time  4. A little of the time  5. None of the time |
| Self-reported SDQ  -emotional subscale | Complains of headaches/stomach aches/sickness  Often seems worried  Often unhappy  Nervous or clingy in new situations  Many fears, easily scared. | Continuous | 1. Not true  2. Somewhat true  3. Certainly true. |
| -conduct subscale | Often has temper tantrums  Generally obedient*  Fights with or bullies other children  Steals from home, school or elsewhere  Often lies or cheats | Continuous |  |
| -hyperactivity subscale | Restless, overactive, cannot stay still for long  Constantly fidgeting  Easily distracted  Can stop and think before acting*  Sees tasks through to the end*. | Continuous |  |
| -peer problems | I am usually on my own. I generally play alone or keep to myself  I have one good friend or more *  Other people my age generally like me *  Other children or young people pick on me or bully me  I get on better with adults than with people my own age | Continuous |  |
| -prosocial | I try to be nice to other people. I care about their feelings  Shares readily with others  Helpful if someone is hurt, upset or ill  Kind to younger children  Often volunteers to help others | Continuous |  |
| Rosenberg self-esteem scale  (5 item) | How much do you agree or disagree with the following statements about you?  On the whole, I am satisfied with myself  I feel I have a number of good qualities  I am able to do things as well as most other people  I am a person of value  I feel good about myself | Continuous |  |
| Suicidality | Have you ever hurt yourself on purpose in an attempt to end your life? | No vs yes |  |
| Doctor diagnosed depression | Has a doctor ever told you that you suffer from depression or serious anxiety? | No vs yes |  |
| Self-harm | During the last year, have you hurt yourself on purpose in any of the following ways?  Cut or stabbed yourself  Burned yourself  Bruised or pinched yourself  Taken an overdose of tablets  Pulled out your hair  Hurt yourself some other way | No vs yes (any kind of self-harm) |  |
| General health description | How would you describe your health generally? Would you say it is: | Excellent/very good/good vs fair/poor |  |
| Sleep quality | During the past month, how would you rate your sleep quality overall? Would you say it has been…  1 …Very good  2 …Fairly good  3 …Fairly bad, or  4 …Very bad? | Very good/fairly good vs fairly bad/very bad |  |
| Weight perception (body image) | Which of these do you think you are?  1 Underweight  2 About the right weight  3 Slightly overweight  4 Very overweight | Right weight vs overweight/underweight | Which of these do you think you are? |
| BMI (kg/m2) | Estimated using objectively measured height and weight | Continuous |  |
| Overweight/obesity | Estimated using IOTF criteria for normal, overweight and obesity | Normal vs. overweight/obesity |  |
| Mental or physical health condition in previous year | Do you have any physical or mental health conditions or illnesses lasting or expected to last 12 months or more? | No vs yes |  |
| **Health related behaviours** |  |  |  |
| Smoking ever | Please read the following statements carefully and decide which one best suit you:  I have never smoked cigarettes  I have only ever tried smoking cigarettes  I used to smoke sometimes but I never smoke now  I sometimes smoke cigarettes now but I  I usually smoke between one and six cigarettes per day  I usually smoke more than six cigarette per day  Do not know  I do not wish to answer  No answer | Never/former versus current |  |
| Current smoking status | Above options | No vs yes |  |
| Frequency of alcohol consumption | How many times have you had an alcoholic drink in the last 12 months? | <5 times vs >5times |  |
| Drug use (any drug use ever) | Have you ever taken any of the following?  Options included: Cannabis (Marijuana, Dope, Pot, Hash, Grass, Ganja, Weed)  Cocaine powder (Coke)  Acid or LSD  Ecstasy  Heroin  Crack  Speed or Amphetamines  Methamphetamine (crystal meth)  Ketamine  Mephedrone  Psychoactive substances | Never vs yes |  |
| Cannabis use only (ever) | Have you ever taken any of the following? | Never vs yes |  |
| Frequency of cannabis use | In the past year how many times have you taken cannabis? | <4 times vs >4 times |  |
| Sexual intercourse (ever had) | Have you ever had sexual intercourse with someone? | No vs yes |  |
| Risky sex (use of contraception) | Do you or any partner regularly use any of these forms of contraception or protection when having sex together? | No vs yes |  |
| Exercise in previous week | On how many days in the last week did you do a total of at least an hour of moderate to vigorous physical activity?  By moderate to vigorous we mean any physical activity that makes you get warmer, breathe harder and makes your heart beat faster, e.g. riding a bike, running, playing football, swimming, dancing, etc. | None vs. any amount |  |
| Antisocial behaviour | Any antisocial behaviour in previous 12 months:  Pushed or shoved/hit/slapped/punched someone?  Hit someone with or used a weapon?  Stolen something from someone. e.g. a mobile phone, money etc.?  Harassed or bothered someone via mobile phone or email?  Sent pictures or spread rumours about someone via phone, email, social media or online?  Made an unwelcome sexual approach or assaulted someone sexually? | Yes or no |  |

**Supplemental Table 3. Associations between sexual identity and binary mental health outcomes in 9,789 young individuals aged 17 from the Millennium Cohort Study. Estimates are from multivariable logistic regression models (models adjusted for sex, parental income and ethnicity)**

|  | *Emotional and behavioural difficulties based on the Strengths and Difficulties Questionnaire (SDQ)* | | | | | | | | | |
| --- | --- | --- | --- | --- | --- | --- | --- | --- | --- | --- |
|  | **Emotional problems** | | **Conduct disorders** | | **Peer problems** | | **Hyperactivity** | | **Prosocial behaviour** | |
| **Sexual identity** | **OR** | **95% CI** | **OR** | **95% CI** | **OR** | **95% CI** | **OR** | **95% CI** | **OR** | **95% CI** |
| Heterosexual | Ref |  | Ref |  | Ref |  | Ref |  | Ref |  |
| Sexual minority | **2.5** | **2.19,2.86** | **1.78** | **1.39,2.27** | **2.17** | **1.86,2.52** | **1.75** | **1.49,2.06** | **1.35** | **1.12,1.62** |
| Other sexual identities | **3.2** | **2.17,4.72** | **3.45** | **1.98,6.01** | **4.16** | **2.88,6.00** | **2.39** | **1.59,3.61** | **4.42** | **2.83,6.90** |
| Observations |  | 9730 |  | 9730 |  | 9729 |  | 9729 |  | 9734 |
|  | **Psychological distress (K-6)a** | | **Self-harm** | | **Attempted suicide** | | **Doctor diagnosed depression** | | **Sleep quality** | |
| **Sexual identity** | **OR** | **95% CI** | **OR** | **95% CI** | **OR** | **95% CI** | **OR** | **95% CI** | **OR** | **95% CI** |
| Heterosexual | Ref |  | Ref |  | Ref |  | Ref |  | Ref |  |
| Sexual minority | **3.26** | **2.84,3.75** | **3.89** | **3.39,4.46** | **3.05** | **2.44,3.82** | **2.56** | **2.19,3.00** | **1.62** | **1.41,1.86** |
| Other sexual identities | **3.7** | **2.55,5.35** | **3.59** | **2.50,5.14** | **2.73** | **1.71,4.35** | **2.3** | **1.50,3.53** | **2.93** | **1.97,4.36** |
| Observations |  | 9966 |  | 9718 |  | 9711 |  | 9959 |  | 6426 |

Text in bold indicate 95% confidence intervals that do not include an odds ratio (OR)=one. CI: Confidence interval. aKessler-6 item scale for psychological distress

**Supplemental Table 4. Associations between sexual identity and binary health indicators in 9,789 young individuals aged 17 from the Millennium Cohort Study. Estimates are from multivariable logistic regression models (models adjusted for sex, parental income and ethnicity)**

|  | **General health** | | **Overweight/obesity** | | **Mental/physical health** | | **Weight perception** | |
| --- | --- | --- | --- | --- | --- | --- | --- | --- |
| **Sexual identity** | **OR** | **95% CI** | **OR** | **95% CI** | **OR** | **95% CI** | **OR** | **95% CI** |
| Heterosexual | Ref |  | Ref |  | Ref |  | Ref |  |
| Sexual minority | **2.1** | **1.73,2.54** | **1.24** | **1.08,1.42** | **2** | **1.73,2.32** | **1.48** | **1.29,1.71** |
| Other sexual identities | **2.88** | **1.80,4.61** | **1.77** | **1.22,2.57** | **4.14** | **2.94,5.83** | **2.25** | **1.42,3.59** |
| Observations |  | 9742 |  | 9242 |  | 9743 |  | 6566 |

Text in bold indicate 95% confidence intervals that do not include an odds ratio (OR)=one.

**Supplemental Table 5. Associations between sexual identity and health related behaviours in 9,789 young individuals aged 17 from the Millennium Cohort Study. Estimates are from multivariable logistic regression models (models adjusted for sex, parental income and ethnicity)**

| **Sexual identity** | **Smoking, ever** | | **Smoking, regular** | | **Alcohol frequency** | | **Drug use, ever** | | **Cannabis use, ever** | |
| --- | --- | --- | --- | --- | --- | --- | --- | --- | --- | --- |
|  | **OR** | **95% CI** | **OR** | **95% CI** | **OR** | **95% CI** | **OR** | **95% CI** | **OR** | **95% CI** |
| Heterosexual | 1 | 1.00,1.00 | 1 | 1.00,1.00 | 1 | 1.00,1.00 | 1 | 1.00,1.00 | 1 | 1.00,1.00 |
| Sexual minority | **1.31** | **1.16,1.48** | **1.32** | **1.12,1.56** | 1.07 | 0.93,1.24 | **1.61** | **1.44,1.80** | **1.61** | **1.43,1.80** |
| Other sexual identities | **0.46** | **0.32,0.67** | 1.39 | 0.83,2.32 | 0.59 | 0.31,1.15 | **0.60** | **0.39,0.93** | **0.60** | **0.38,0.93** |
| Observations |  | 9927 |  | 9927 |  | 7806 |  | 9958 |  | 9944 |
|  | **Cannabis, frequency** | | **Sex, ever had** | | **Risky sex** | | **Exercise** | | **Anti-social behaviour** | |
| **Sexual identity** | **OR** | **95% CI** | **OR** | **95% CI** | **OR** | **95% CI** | **OR** | **95% CI** | **OR** | **95% CI** |
| Heterosexual | 1 | 1.00,1.00 | 1 | 1.00,1.00 | 1 | 1.00,1.00 | 1 | 1.00,1.00 | 1 | 1.00,1.00 |
| Sexual minority | **1.29** | **1.01,1.65** | 0.9 | 0.80,1.02 | **1.45** | **1.20,1.75** | **1.31** | **1.14,1.49** | **1.37** | **1.20,1.58** |
| Other sexual identities | 0.50 | 0.15,1.63 | **0.25** | **0.17,0.39** | 0.81 | 0.33,1.98 | **1.60** | **1.12,2.27** | 0.87 | 0.54,1.41 |
| Observations |  | 2835 |  | 9896 |  | 3902 |  | 9745 |  | 9966 |

**Supplemental Table 6. Associations between sexual identity and binary mental health outcomes in 9,789 young individuals aged 17 from the Millennium Cohort Study. Estimates are from multivariable logistic regression models (models adjusted for sex, parental income and ethnicity)**

|  | *Emotional and behavioural difficulties based on the Strengths and Difficulties Questionnaire* | | | | | | | | | |
| --- | --- | --- | --- | --- | --- | --- | --- | --- | --- | --- |
|  | **Emotional problems** | | **Conduct disorders** | | **Peer problems** | | **Hyperactivity** | | **Prosocial behaviour** | |
| **Sexual identity** | **OR** | **95% CI** | **OR** | **95% CI** | **OR** | **95% CI** | **OR** | **95% CI** | **OR** | **95% CI** |
| Heterosexual | Ref |  | Ref |  | Ref |  | Ref |  | Ref |  |
| Sexual minority | **2.5** | **2.19,2.86** | **1.78** | **1.39,2.27** | **2.17** | **1.86,2.52** | **1.75** | **1.49,2.06** | **1.35** | **1.12,1.62** |
| Other | **3.99** | **2.62,6.06** | **3.63** | **2.10,6.28** | **4.55** | **3.12,6.63** | **2.71** | **1.78,4.14** | **4.1** | **2.60,6.46** |
| PNTS/don’t Know | 1.12 | 0.41,3.02 | 2.79 | 0.76,10.17 | **2.8** | **1.17,6.67** | 1.16 | 0.34,3.90 | **6.0** | **2.27,15.83** |
| Observations | 9730 |  | 9730 |  | 9729 |  | 9729 |  | 9734 |  |
|  | **Psychological distress (K-6)a** | | **Self-harm** | | **Attempted suicide** | | **Doctor diagnosed depression** | | **Sleep quality** | |
| **Sexual identity** | **OR** | **95% CI** | **OR** | **95% CI** | **OR** | **95% CI** | **OR** | **95% CI** | **OR** | **95% CI** |
| Heterosexual | Ref |  | Ref |  | Ref |  | Ref |  | Ref |  |
| Sexual minority | **3.26** | **2.84,3.76** | **3.89** | **3.39,4.46** | **3.06** | **2.45,3.82** | **2.56** | **2.19,3.00** | **1.62** | **1.41,1.86** |
| Other | **4.50** | **3.02,6.71** | **4.85** | **3.26,7.19** | **3.45** | **2.11,5.65** | **2.64** | **1.68,4.16** | **3.77** | **2.42,5.86** |
| PNTS/don’t Know | 1.32 | 0.46,3.82 | 0.56 | 0.21,1.52 | **0.21** | **0.06,0.82** | 1.05 | 0.36,3.03 | 0.66 | 0.17,2.66 |
| Observations | 9966 |  | 9718 |  | 9711 |  | 9959 |  | 6426 |  |

Text in bold indicate 95% confidence intervals that do not include an odds ratio (OR)=one. CI: Confidence interval. aKessler-6 item scale for psychological distress

**Supplemental Table 7. Associations between sexual identity and binary health indicators in 9,789 young individuals aged 17 from the Millennium Cohort Study. Estimates are from multivariable logistic regression models (models adjusted for sex, parental income and ethnicity)**

|  | **General health** | | **Overweight/obesity** | | **Mental/physical health** | | **Weight perception** | |
| --- | --- | --- | --- | --- | --- | --- | --- | --- |
| **Sexual identity** | **OR** | **95% CI** | **OR** | **95% CI** | **OR** | **95% CI** | **OR** | **95% CI** |
| Heterosexual | Ref |  | Ref |  | Ref |  | Ref |  |
| Sexual minority | **2.1** | **1.73,2.54** | **1.24** | **1.08,1.42** | **2** | **1.73,2.32** | **1.48** | **1.29,1.71** |
| Other | **3.12** | **1.85,5.29** | **2.14** | **1.41,3.23** | **4.27** | **2.91,6.26** | **2.88** | **1.76,4.73** |
| PNTS/Don’t know | 2.09 | 0.68,6.40 | 0.82 | 0.34,1.93 | **3.68** | **1.77,7.63** | 0.77 | 0.28,2.15 |
| Observations | 9742 |  | 9242 |  | 9743 |  | 6566 |  |

Text in bold indicate 95% confidence intervals that do not include an odds ratio (OR)=one.

**Supplemental Table 8. Associations between sexual identities and health related behaviours in 9,789 young individuals aged 17 from the Millennium Cohort Study. Estimates are from multivariable logistic regression models (models adjusted for sex, parental income and ethnicity)**

| **Sexual identity** | **Smoking, ever** | | **Smoking, regular** | | **Alcohol frequency** | | **Drug use, ever** | | **Cannabis use, ever** | |
| --- | --- | --- | --- | --- | --- | --- | --- | --- | --- | --- |
|  | **OR** | **95% CI** | **OR** | **95% CI** | **OR** | **95% CI** | **OR** | **95% CI** | **OR** | **95% CI** |
| Heterosexual | Ref |  | Ref |  | Ref |  | Ref |  | Ref |  |
| Sexual minority | **1.31** | **1.16,1.48** | **1.32** | **1.12,1.56** | 1.07 | 0.93,1.24 | **1.61** | **1.44,1.81** | **1.61** | **1.43,1.80** |
| Other | **0.54** | **0.36,0.82** | 1.47 | 0.85,2.54 | 0.69 | 0.35,1.34 | 0.68 | 0.42,1.10 | 0.68 | 0.42,1.10 |
| PNTS/Don’t know | **0.16** | **0.04,0.62** | 1.04 | 0.28,3.88 | 1 | 1.00,1.00 | 0.27 | 0.07,1.07 | 0.28 | 0.07,1.08 |
| Observations |  | 9927 |  | 9927 |  | 7806 |  | 9958 |  | 9944 |
|  | **Cannabis, frequency** | | **Sex, ever had** | | **Risky sex** | | **Exercise** | | **Anti-social behaviour** | |
| **Sexual identity** | **OR** | **95% CI** | **OR** | **95% CI** | **OR** | **95% CI** | **OR** | **95% CI** | **OR** | **95% CI** |
| Heterosexual | Ref |  | Ref |  | Ref |  | Ref |  | Ref |  |
| Sexual minority | **1.29** | **1.01,1.65** | 0.91 | 0.81,1.02 | **1.45** | **1.20,1.76** | **1.31** | **1.14,1.49** | **1.37** | **1.20,1.58** |
| Other | 0.54 | 0.16,1.85 | **0.25** | **0.16,0.40** | 0.97 | 0.38,2.46 | **1.76** | **1.18,2.61** | 0.94 | 0.56,1.58 |
| PNTS/Don’t know | 0.25 | 0.02,3.06 | **0.26** | **0.09,0.76** | 1 | 1.00,1.00 | 1.07 | 0.47,2.43 | 0.59 | 0.18,1.96 |
| Observations |  | 2835 |  | 9896 |  | 3902 |  | 9745 |  | 9966 |

Text in bold indicate 95% confidence intervals that do not include an odds ratio (OR)=one.
