# Supplementary material for: Health inequalities in sexual minority adolescents other than gay, lesbian and bisexual – consequences of exclusion. Findings from a national cross-sectional study
Source: Research Square preprint supplement (doi:10.21203/rs.3.rs-6572439/v1), 2025-05-07
Supplement: Supplementary file 2 [file 874a1d8591975f15575ee3d2.docx]

**Tables & Figures**

**Table 1. Options for sexual identity in some of the commonly used UK datasets for sexual minority health research**

| **United Kingdom 2021 Census** | **Millennium Cohort Study** | **Understanding Society** | **ALSPAC** | **Next Steps** | **National surveys:** | | |
| --- | --- | --- | --- | --- | --- | --- | --- |
|  |  |  |  |  | **GP Patient Survey** | **APMS** | **Health Survey for England** |
| Straight/  heterosexual | Completely heterosexual/ straight | Heterosexual or straight | 100% heterosexual (straight) | Heterosexual or straight | Heterosexual or straight | Heterosexual or straight | Heterosexual |
|  | Mainly heterosexual/ straight |  | Mostly heterosexual |  |  |  |  |
| Gay or lesbian | Completely gay or lesbian | Gay or lesbian | 100% homosexual (gay) | Gay or lesbian | Gay or lesbian | Gay or lesbian | Gay/lesbian, |
|  | Mainly gay or lesbian |  | Mostly homosexual |  |  |  |  |
| Bisexual | Bisexual | Bisexual | Bisexual | Bisexual | Bisexual | Bisexual | Bisexual |
| Other sexual orientation | Other | Other |  | Other | Other | Other | other |
|  | Prefer not to say/Do not know | Prefer not to say |  |  | I would prefer not to say |  |  |

**Table 2. Distribution of study participants by key sociodemographic variables and sexual/gender identities. Estimates are N and frequencies (in italics).**

| **Sociodemographic variable** | **Heterosexual** | **Sexual minority** | **Other sexual identities** | **Total** | **p-Valuea** |
| --- | --- | --- | --- | --- | --- |
| **Sex at birth** Males | 4,137 | 680 | 66 | 4,883 | <0.001 |
|  | *52.96* | *34.31* | *32.35* | *48.84* |  |
| Females | 3,675 | 1,302 | 138 | 5,115 |  |
|  | *47.04* | *65.69* | *67.65* | *51.16* |  |
| **Ethnicity** |  |  |  |  |  |
| White | 6,193 | 1,727 | 162 | 8,082 | <0.001 |
|  | *79.31* | *87.22* | *79.41* | *80.88* |  |
| Ethnic-minority | 1,616 | 253 | 42 | 1,911 |  |
|  | *20.69* | *12.78* | *20.59* | *19.12* |  |
| **Parental education** |  |  |  |  |  |
| NVQ1 | 366 | 71 | 9 | 446 | <0.001 |
|  | *4.69* | *3.59* | *4.41* | *4.46* |  |
| NVQ2 | 1,671 | 393 | 48 | 2,112 |  |
|  | *21.4* | *19.85* | *23.53* | *21.14* |  |
| NVQ3 | 1,227 | 260 | 32 | 1,519 |  |
|  | *15.72* | *13.13* | *15.69* | *15.2* |  |
| NVQ4 | 2,865 | 833 | 60 | 3,758 |  |
|  | *36.7* | *42.07* | *29.41* | *37.61* |  |
| NVQ5 | 858 | 304 | 23 | 1,185 |  |
|  | *10.99* | *15.35* | *11.27* | *11.86* |  |
| Overseas/other | 820 | 119 | 32 | 971 |  |
|  | *10.5* | *6.01* | *15.69* | *9.72* |  |
| **Parental income** |  |  |  |  |  |
| Quintile 1 | 1,620 | 346 | 43 | 2,009 | <0.001 |
|  | *20.77* | *17.48* | *21.08* | *20.12* |  |
| Quintile 2 | 1,626 | 367 | 53 | 2,046 |  |
|  | *20.85* | *18.54* | *25.98* | *20.49* |  |
| Quintile 3 | 1,578 | 380 | 41 | 1,999 |  |
|  | *20.23* | *19.2* | *20.1* | *20.02* |  |
| Quintile 4 | 1,480 | 402 | 43 | 1,925 |  |
|  | *18.97* | *20.31* | *21.08* | *19.28* |  |
| Quintile 5 | 1,496 | 484 | 24 | 2,004 |  |
|  | *19.18* | *24.46* | *11.76* | *20.07* |  |
| **Sexual attraction** |  |  |  |  |  |
| Definite sexual attraction | 7,634 | 1,927 | 97 | 9,658 | <0.001 |
|  | *97.72* | *97.23* | *47.55* | *96.6* |  |
| No sexual attraction | 157 | 51 | 76 | 284 |  |
|  | *2.01* | *2.57* | *37.25* | *2.84* |  |
| Do not know/no answer | 21 | 4 | 31 | 56 |  |
|  | *0.27* | *0.2* | *15.2* | *0.56* |  |
| **Gender identity** |  |  |  |  |  |
| Male | 4,122 | 672 | 52 | 4,846 | <0.001 |
|  | *52.81* | *33.97* | *25.62* | *48.52* |  |
| Female | 3,675 | 1,254 | 98 | 5,027 |  |
|  | *47.08* | *63.4* | *48.28* | *50.34* |  |
| Androgynous/GF/Non-binary/other | 0 | 32 | 23 | 55 |  |
|  | *0* | *1.62* | *11.33* | *0.55* |  |
| PNTS/refused | 9 | 20 | 30 | 59 |  |
|  | *0.12* | *1.01* | *14.78* | *0.59* |  |

aTest for differences in proportions using Chi2 tests (or Fisher’s exact test for variables with categories having <5 observations)

**Table 3. Associations between sociodemographic variables and sexual identities in 9,789 young individuals aged 17 from the Millennium Cohort Study. Estimates are from multivariable multinomial logistic regression models.**

|  | **Sex** | | **Ethnicity** | | **Parental education** | | **Parental income** | | **Alla** | |
| --- | --- | --- | --- | --- | --- | --- | --- | --- | --- | --- |
|  | **RRR** | **95% CI** | **RRR** | **95% CI** | **RRR** | **95% CI** | **RRR** | **95% CI** | **RRR** | **95% CI** |
| ***Heterosexual*** | Ref |  | Ref |  | Ref |  | Ref |  | Ref |  |
| ***Sexual minority*** |  |  |  |  |  |  |  |  |  |  |
| Males | Ref |  |  |  |  |  |  |  | Ref |  |
| Females | **2.25** | **2.00,2.55** |  |  |  |  |  |  | **2.28** | **2.02,2.58** |
| **Ethnicity** |  |  |  |  |  |  |  |  |  |  |
| White |  |  | Ref |  |  |  |  |  | Ref |  |
| Mixed |  |  | **1.44** | **1.07,1.95** |  |  |  |  | 1.36 | 0.99,1.87 |
| South Asian |  |  | **0.42** | **0.32,0.56** |  |  |  |  | **0.42** | **0.31,0.56** |
| Black |  |  | **0.60** | **0.44,0.81** |  |  |  |  | **0.58** | **0.43,0.78** |
| Other |  |  | 1.25 | 0.82,1.92 |  |  |  |  | 1.27 | 0.82,1.98 |
| **Parental education** |  |  |  |  |  |  |  |  |  |  |
| Overseas/other |  |  |  |  | **0.50** | **0.38,0.66** |  |  | **0.49** | **0.37,0.66** |
| NVQ1 |  |  |  |  | **0.54** | **0.39,0.74** |  |  | **0.49** | **0.35,0.69** |
| NVQ2 |  |  |  |  | **0.64** | **0.52,0.78** |  |  | **0.61** | **0.49,0.76** |
| NVQ3 |  |  |  |  | **0.56** | **0.44,0.69** |  |  | **0.53** | **0.42,0.67** |
| NVQ4 |  |  |  |  | **0.78** | **0.65,0.93** |  |  | **0.78** | **0.65,0.94** |
| NVQ5 |  |  |  |  | Ref |  |  |  | Ref |  |
| **Parental income** |  |  |  |  |  |  |  |  |  |  |
| Quintile 1 |  |  |  |  |  |  | **0.8** | **0.67,0.95** | **1.2** | **1.00,1.45** |
| Quintile 2 |  |  |  |  |  |  | **0.79** | **0.66,0.94** | 1.08 | 0.90,1.30 |
| Quintile 3 |  |  |  |  |  |  | **0.78** | **0.65,0.93** | 0.95 | 0.80,1.14 |
| Quintile 4 |  |  |  |  |  |  | 0.87 | 0.74,1.03 | 0.97 | 0.82,1.14 |
| Quintile 5 (Highest) |  |  |  |  |  |  | Ref |  | Ref |  |
| ***Other sexual identities*** |  |  |  |  |  |  |  |  |  |  |
| Males | Ref |  |  |  |  |  |  |  | Ref |  |
| Females | **2.63** | **1.83,3.77** |  |  |  |  |  |  | **2.61** | **1.81,3.77** |
| **Ethnicity** |  |  |  |  |  |  |  |  |  |  |
| White |  |  |  |  |  |  |  |  | Ref |  |
| Mixed |  |  | 1.29 | 0.50,3.38 |  |  |  |  | 1.19 | 0.44,3.20 |
| South Asian |  |  | 1.1 | 0.66,1.84 |  |  |  |  | 0.88 | 0.51,1.50 |
| Black |  |  | 0.46 | 0.17,1.22 |  |  |  |  | 0.39 | 0.15,1.04 |
| Other |  |  | 1.24 | 0.53,2.88 |  |  |  |  | 1.05 | 0.43,2.59 |
| **Parental education** |  |  |  |  |  |  |  |  |  |  |
| Overseas/other |  |  |  |  | 1.59 | 0.87,2.91 |  |  | 1.22 | 0.54,2.74 |
| NVQ1 |  |  |  |  | 1.05 | 0.47,2.31 |  |  | 0.74 | 0.31,1.78 |
| NVQ2 |  |  |  |  | 1.14 | 0.64,2.05 |  |  | 0.87 | 0.47,1.62 |
| NVQ3 |  |  |  |  | 0.98 | 0.51,1.87 |  |  | 0.74 | 0.38,1.44 |
| NVQ4 |  |  |  |  | 0.85 | 0.47,1.55 |  |  | 0.76 | 0.41,1.41 |
| NVQ5 |  |  |  |  | Ref |  |  |  | Ref |  |
| **Parental income** |  |  |  |  |  |  |  |  |  |  |
| Quintile 1 |  |  |  |  |  |  | 1.71 | 0.95,3.10 | 1.62 | 0.77,3.39 |
| Quintile 2 |  |  |  |  |  |  | **2.17** | **1.25,3.75** | **2.15** | **1.19,3.88** |
| Quintile 3 |  |  |  |  |  |  | 1.47 | 0.81,2.68 | 1.54 | 0.82,2.90 |
| Quintile 4 |  |  |  |  |  |  | **1.68** | **1.02,2.75** | **1.75** | **1.09,2.83** |
| Quintile 5 (Highest) |  |  |  |  |  |  | Ref |  | Ref |  |
| *Observations* |  | *9983* |  | *9983* |  | *9983* |  | *9983* |  | *9983* |

aModel including all predictors of interest (i.e., mutually adjusted). Text in bold indicate 95% confidence intervals that do not include a relative risk ratio (RRR) = 1

**Figure 1. Associations between sexual identity and mental health in 9927 individuals ages 17 years from the Millennium Cohort Study. Estimates are from multivariable logistic regression models.**

OSI: Other sexual identity

**Figure 2. Associations between sexual identity and general health in 9927 individuals ages 17 years from the Millennium Cohort Study. Estimates are from multivariable logistic regression models.**

OSI: Other sexual identity

**Figure 3. Estimates for associations between sexual identiy and health-related behaviours in 9927 individuals ages 17 years from the Millennium Cohort Study. Estimates are from multivariable logistic regression models.**

OSI: Other sexual identity
